# Supplementary material for: Encapsulation of lipophilic kiteplatin Pt(iv) prodrugs in PLGA-PEG micelles
Source: Royal Society of Chemistry journal article supplement (doi:10.1039/c6dt00763e), 2016-01-01
Supplement: c6dt00763e1.pdf [file c6dt00763e1.pdf]

## SUPPLEMENTARY INFORMATION

### Encapsulation of lipophilic kiteplatin Pt(IV) prodrugs in PLGA-PEG micelles.

*Nicola Margiotta,<sup>1,\*</sup> Salvatore Savino,<sup>1</sup> Nunzio Denora,<sup>2</sup> Cristina Marzano,<sup>3</sup> Valentino Laquintana,<sup>2</sup>  
Annalisa Cutrignelli,<sup>2</sup> James D. Hoeschele,<sup>4</sup> Valentina Gandin,<sup>3</sup> Giovanni Natile.<sup>1,\*</sup>*

<sup>1</sup>Dipartimento di Chimica, Università degli Studi di Bari Aldo Moro, via E. Orabona 4, 70125 Bari (Italy);

<sup>2</sup>Dipartimento di Farmacia-Scienze del Farmaco, Università degli Studi di Bari Aldo Moro, via E. Orabona 4, 70125 Bari (Italy);

<sup>3</sup>Dipartimento di Scienze del Farmaco, Università di Padova, via Marzolo 5, 35131 Padova (Italy);

<sup>4</sup>Department of Chemistry, Eastern Michigan University, Ypsilanti, MI, USA 48197.

Content of Sup. Info.:

NMR characterization of **1** (Figure S1: <sup>1</sup>H NMR; Figure S2: COSY; Figure S3: [<sup>1</sup>H-<sup>195</sup>Pt]-HSQC; Figure S4: [<sup>1</sup>H-<sup>13</sup>C] HSQC).

NMR characterization of **2** (Figure S5: <sup>1</sup>H NMR; Figure S6: TOCSY; Figure S7: [<sup>1</sup>H-<sup>195</sup>Pt]-HSQC; Figure S8: [<sup>1</sup>H-<sup>13</sup>C] HSQC).

IR characterization of PLGA-PEG (Figure S9: FT-IR spectrum).

Calculation of Pt atoms per NP.

**NMR characterization of *cis,trans,cis*-[PtCl<sub>2</sub>{O<sub>2</sub>C(CH<sub>2</sub>)<sub>4</sub>CH<sub>3</sub>}<sub>2</sub>(*cis*-1,4-DACH)] (1).**

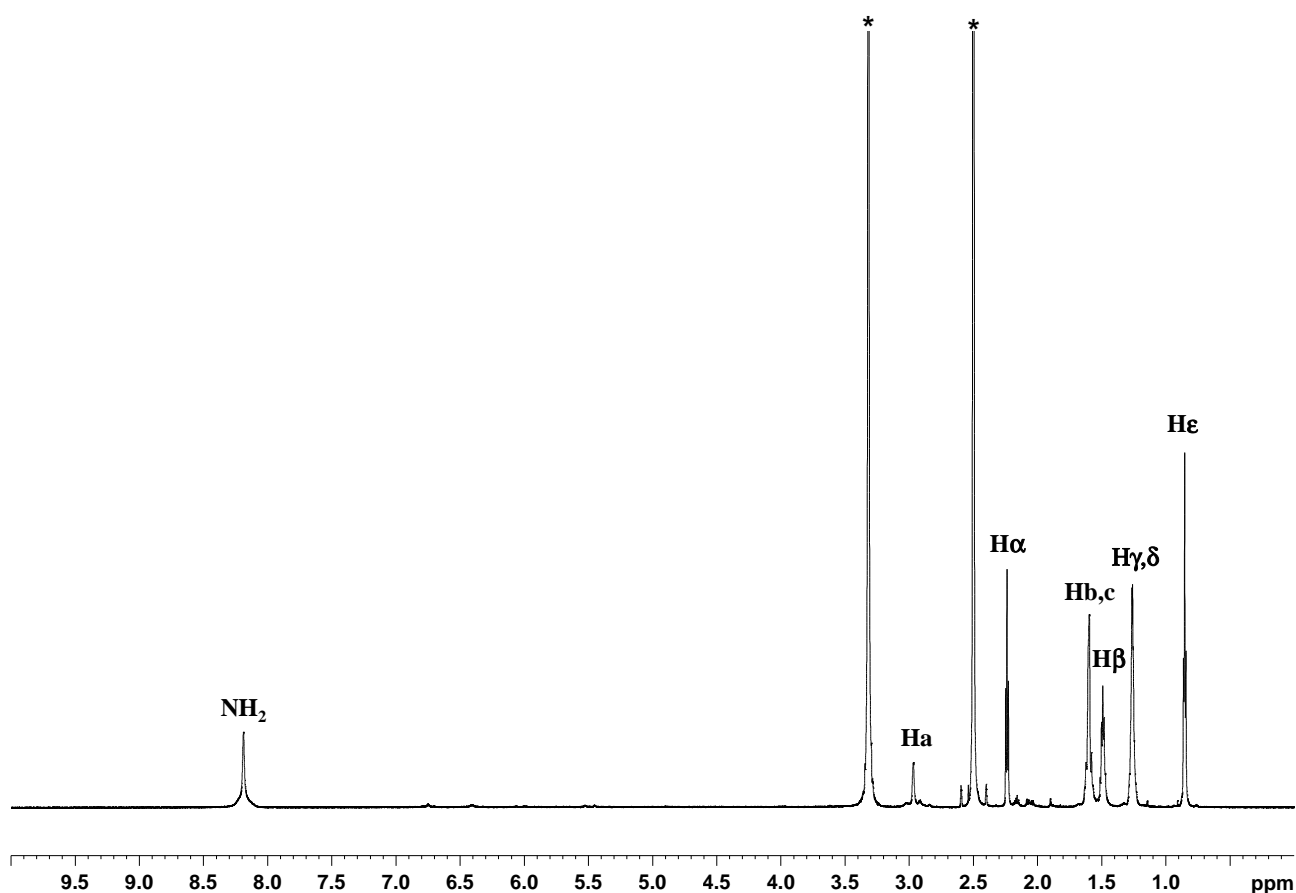

**Figure S1.** <sup>1</sup>H NMR (700 MHz, <sup>1</sup>H) spectrum of **1** in DMSO-d<sub>6</sub>. The asterisks indicate residual solvent peaks.

The <sup>1</sup>H COSY 2D spectrum of compound **1** in DMSO-d<sub>6</sub> (Figure S2) shows a cross peak, falling at 2.96/1.58 ppm correlating the CH and CH<sub>2</sub> groups of coordinated DACH. A second cross peak falling at 2.22/1.47 ppm correlates the methylenic groups in α and β positions of the hexanoato ligand (see Chart 2 for numbering of protons). Finally, the cross peaks falling at 1.47/1.24 and 1.24/0.84 ppm correlate β CH<sub>2</sub> with γ CH<sub>2</sub> and γ CH<sub>2</sub> with the ε CH<sub>3</sub> of the alkyl chain, respectively.

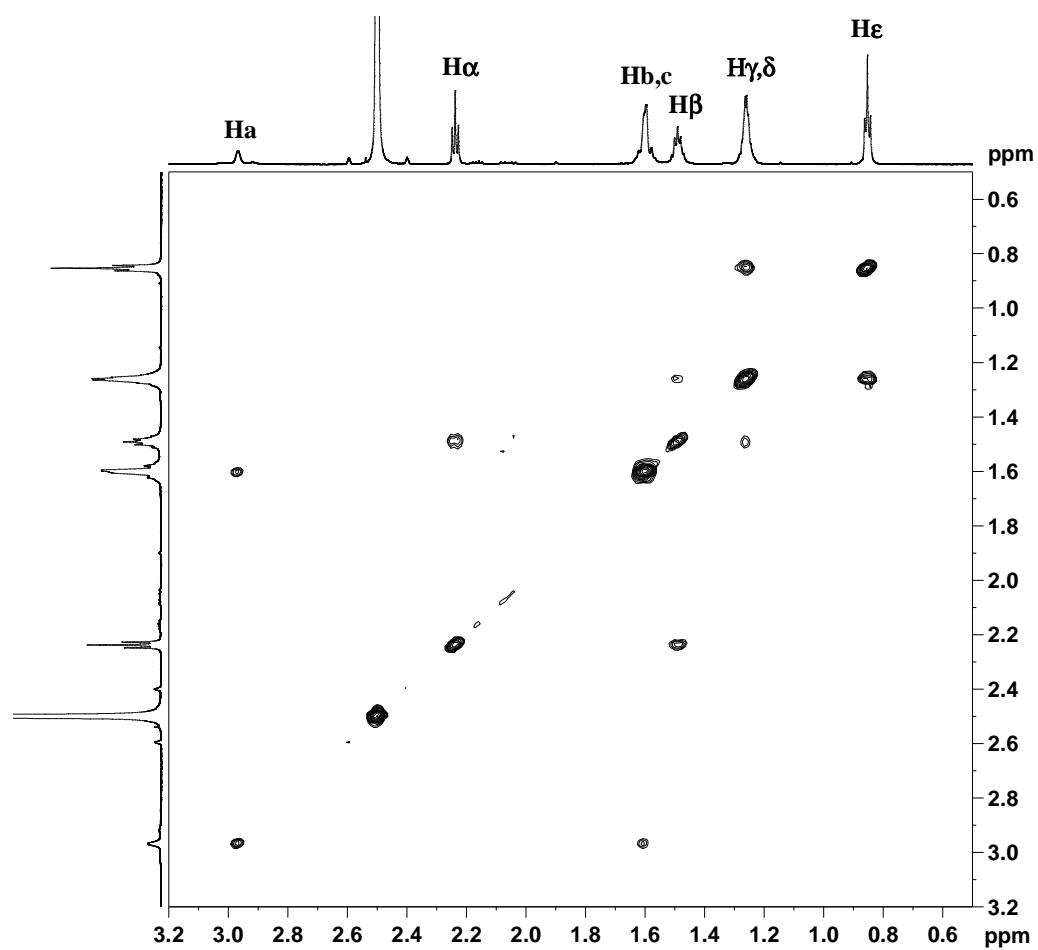

**Figure S2.** Portion of  $^1\text{H}$  (top and left) and COSY 2D (central) NMR spectra (700 MHz,  $^1\text{H}$ ) of **1** in  $\text{DMSO-d}_6$ .

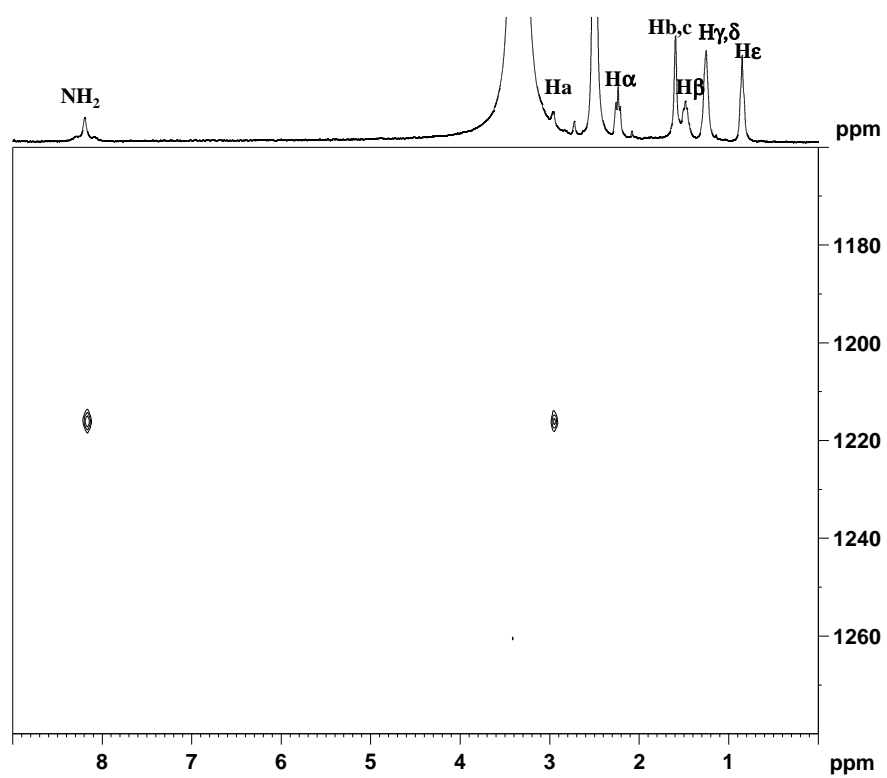

**Figure S3.**  $[\text{}^1\text{H}-^{195}\text{Pt}]\text{-HSQC}$  2D NMR (300 MHz,  $^1\text{H}$ ) of **1** in  $\text{DMSO-d}_6$ .

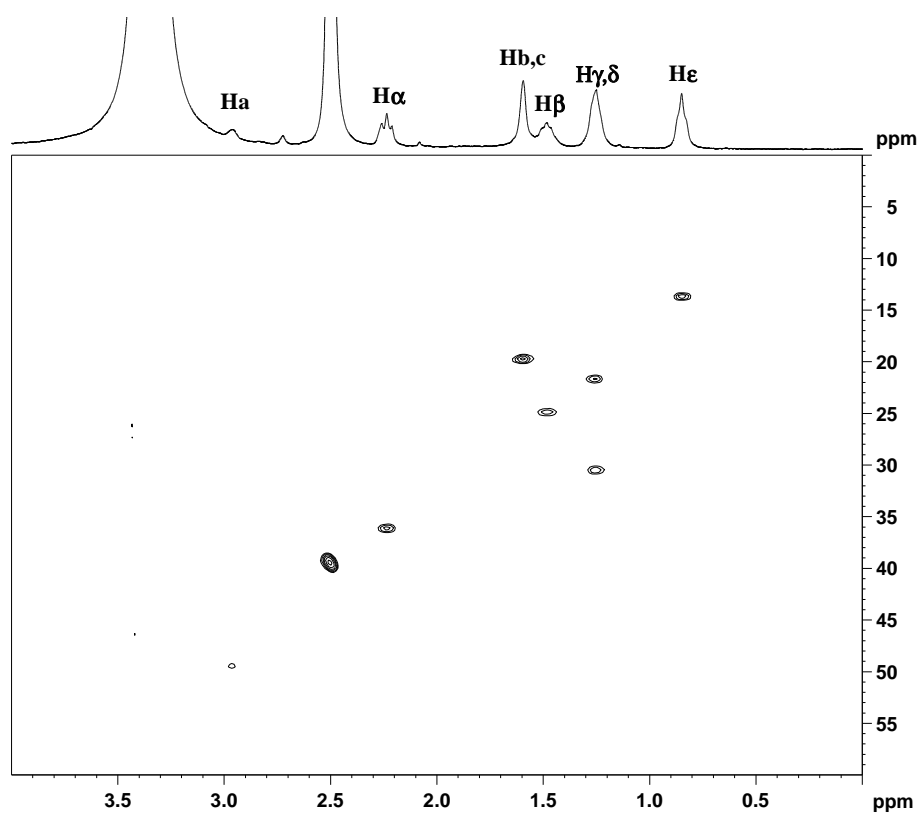

**Figure S4.**  $^1\text{H}$  (top) and  $[\text{}^1\text{H}-^{13}\text{C}]$  HSQC 2D (bottom) NMR (300 MHz,  $^1\text{H}$ ) spectra of **1** in DMSO- $d_6$ .

**NMR characterization of *cis,trans,cis*-[PtCl<sub>2</sub>{O<sub>2</sub>C(CH<sub>2</sub>)<sub>8</sub>CH<sub>3</sub>}<sub>2</sub>(*cis*-1,4-DACH)] (2).**

The <sup>1</sup>H NMR of compound **2** in DMSO-d<sub>6</sub> showed seven different signals (Figure S5). The singlet with Pt satellites resonating at 8.19 ppm (<sup>2</sup>J<sub>H-Pt</sub> = 64.3 Hz) was assigned to the aminic protons of coordinated *cis*-1,4-DACH. The singlet with Pt satellites falling at 2.96 ppm (<sup>3</sup>J<sub>Pt-H</sub> = 81.0 Hz) was assigned to the methynic protons of coordinated DACH while the triplet located at 2.23 ppm and integrating for 4 protons was assigned to the CH<sub>2</sub> protons in α position to the carboxylate group of decanoato ligands (H<sub>α</sub>, see Chart 2 for numbering of protons). The multiplet located at 1.59 ppm and integrating for eight protons was assigned to the methylenic groups of coordinated DACH. The quintet resonating at 1.48 ppm integrating for four protons was assigned to the CH<sub>2</sub> in β positions to the carboxylate group (H<sub>β</sub> in Figure S5). The multiplet falling at 1.23 ppm and integrating for twenty-four protons was assigned to the methylenic groups in γ, δ, ε, ζ, η, and θ positions of coordinated decanoato ligand while the triplet resonating at 0.85 ppm and integrating for six protons was attributed to the terminal (ι) methyl groups (Figure S5).

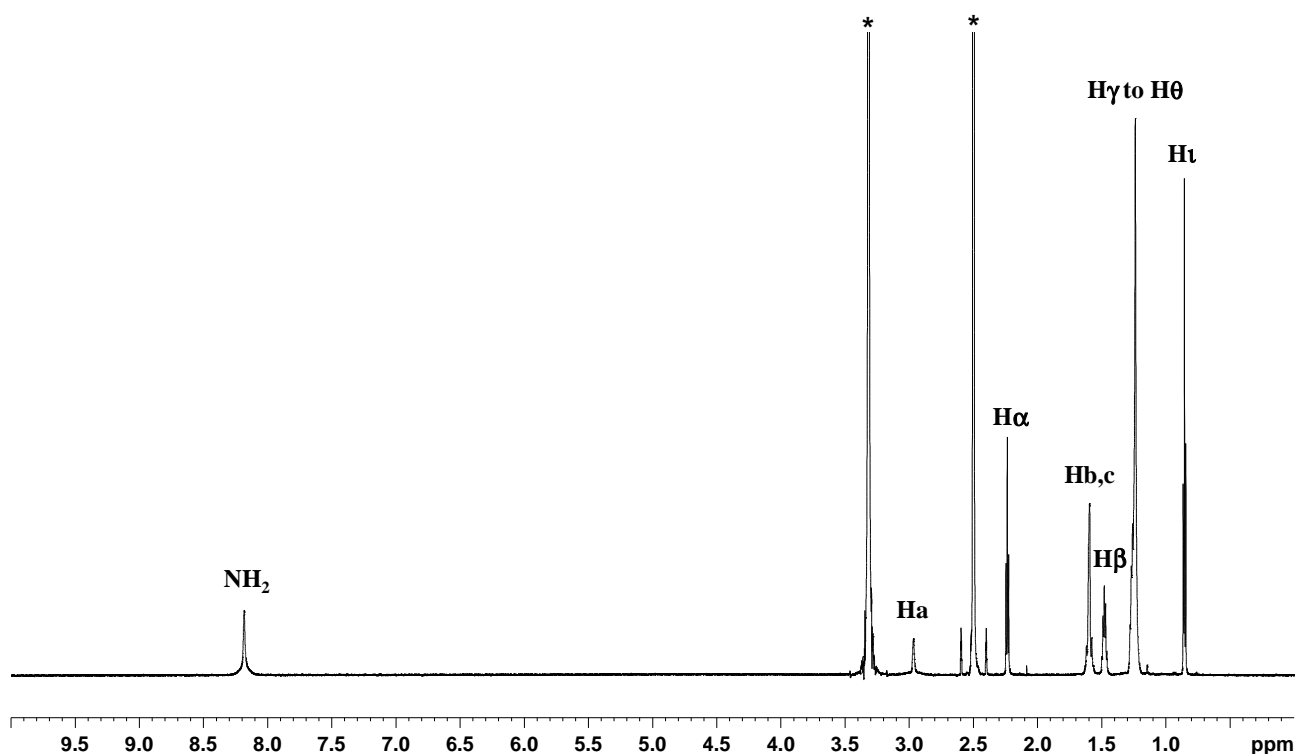

**Figure S5.**  $^1\text{H}$  NMR (700 MHz,  $^1\text{H}$ ) spectrum of **2** in DMSO- $\text{d}_6$ . The asterisks indicate residual solvent peaks.

The assignment was also supported by a TOCSY 2D NMR spectrum recorded in DMSO- $\text{d}_6$ .

A portion of this spectrum is reported in Figure S6 and shows the cross peak falling at 2.96/1.59 ppm correlating the CH and  $\text{CH}_2$  groups of coordinated DACH. Another cross peak falling at 2.23/1.48 ppm correlates the methylenic groups in  $\alpha$  and  $\beta$  positions of the decanoato ligands. A third cross peak falling at 2.23/1.23 represents a long range coupling between the  $\beta$   $\text{CH}_2$  and one or more  $\text{CH}_2$  overlapping at 1.23 ppm. Finally the cross peaks at 1.48/1.23 and 1.23/0.85 ppm indicate coupling between  $\gamma$   $\text{CH}_2$  and  $\delta$   $\text{CH}_2$  and between  $\theta$   $\text{CH}_2$  and terminal ( $\iota$ )  $\text{CH}_3$ .

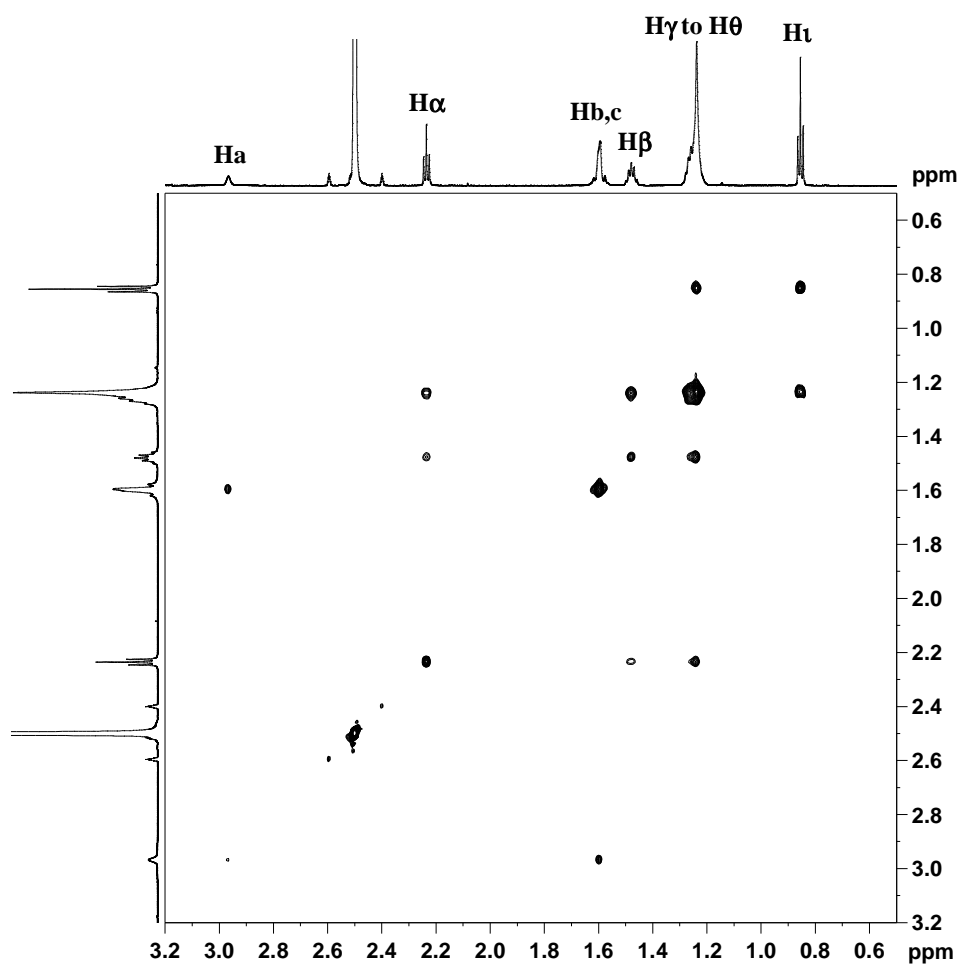

**Figure S6.** Portion of  $^1\text{H}$  (top and left) and TOCSY 2D NMR spectra (700 MHz,  $^1\text{H}$ ) of **2** in DMSO- $\text{d}_6$ .



The [ $^1\text{H}$ - $^{195}\text{Pt}$ ]-HSQC 2D NMR spectrum of compound **2** in DMSO- $d_6$  is reported in Figure S7. The spectrum shows two cross peaks falling at 8.19/1217.2 and 2.96/1217.2 ppm ( $^1\text{H}/^{195}\text{Pt}$ ). The  $^{195}\text{Pt}$  chemical shift is in good agreement with that reported in the literature for the same complex (1085 ppm in  $\text{CDCl}_3$  referenced to  $\text{Na}_2\text{PtCl}_6$  as external standard placed at 0.00 ppm in  $\text{D}_2\text{O}$ ).<sup>1</sup>

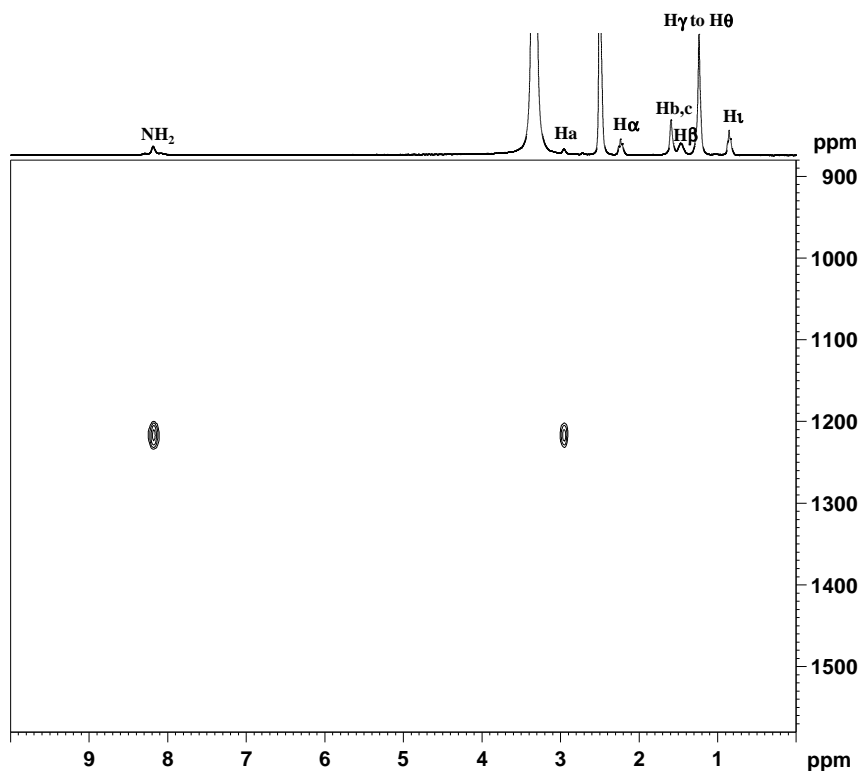

**Figure S7.** [ $^1\text{H}$ - $^{195}\text{Pt}$ ]-HSQC 2D NMR of **2** in DMSO- $d_6$ .

The NMR characterization of the carbon atoms was obtained by a [ $^1\text{H}$ - $^{13}\text{C}$ ]-HSQC 2D NMR experiment performed in DMSO- $d_6$  (Figure S8). The cross peaks falling at 2.96/49.4 and 1.59/19.77 ppm ( $^1\text{H}/^{13}\text{C}$ ), were attributed to the methynic and methylenic groups of DACH, respectively.

The  $^{13}\text{C}$  chemical shifts of the alkyl chain of coordinated decanoate (13.70, 21.70, 25.22, 28.54, 30.97, and 36.27) are in good agreement with those reported in the literature for *cis,trans,cis*- $[\text{PtCl}_2\{\text{O}_2\text{C}(\text{CH}_2)_8\text{CH}_3\}_2(\text{NH}_3)_2]$  (13.97, 22.12, 25.46 28.65, 28.72, 28.95, 28.96, 31.33, and 35.70 ppm).<sup>2</sup>

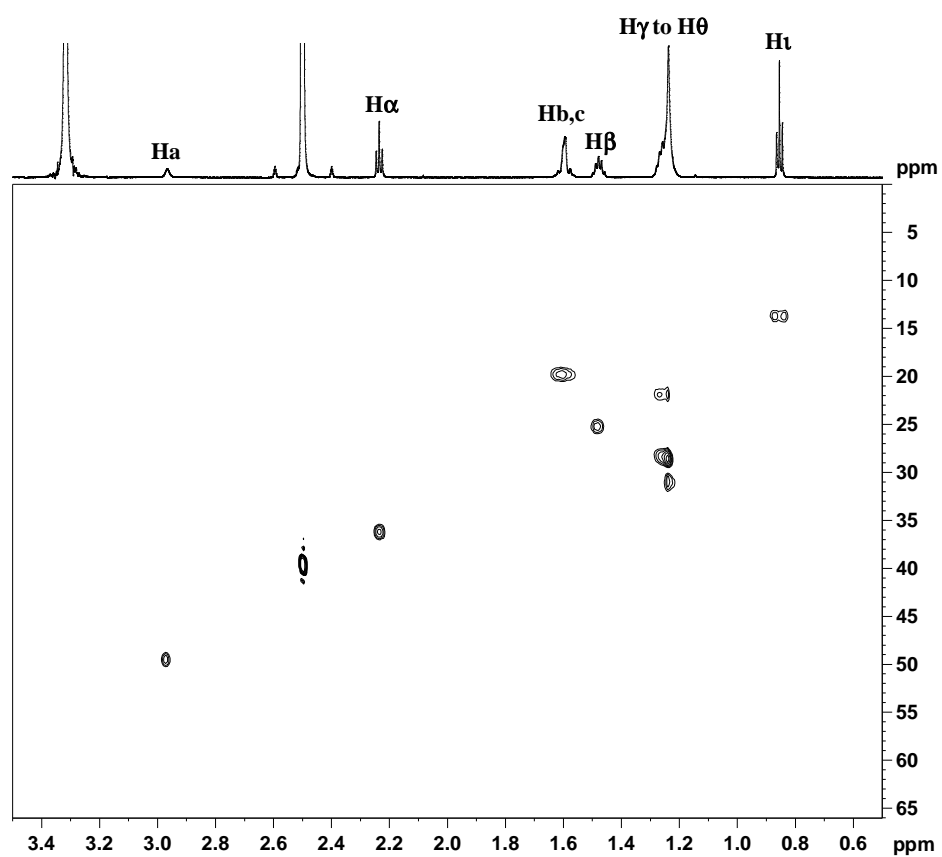

**Figure S8.**  $^1\text{H}$  (top) and  $[^1\text{H}-^{13}\text{C}]$  HSQC 2D NMR (700 MHz,  $^1\text{H}$ ) spectra of **2** in  $\text{DMSO-d}_6$

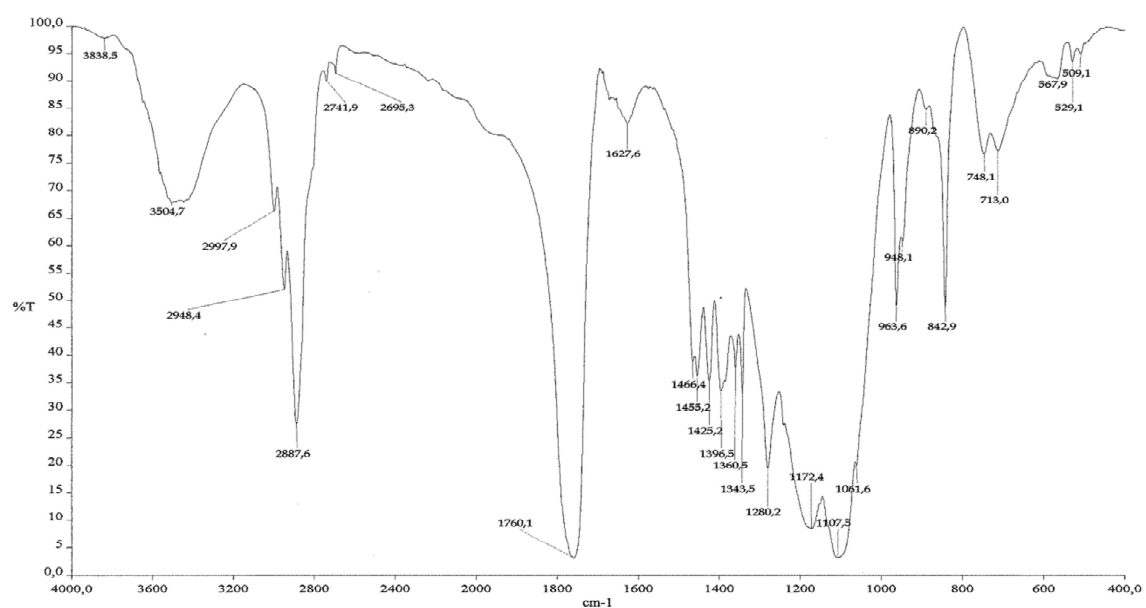

**Figure S9.** FT-IR spectrum of the PLGA-PEG polymer

### Calculation of Pt atoms per nanoparticle.

The number of Pt atoms per nanoparticle has been calculated by entering the data reported in Table S1 in the following formula:

$$\frac{Pt_{atoms}}{NP} = \frac{\left[ Pt_{loading} \left( \frac{g}{L} \right) * N \left( \frac{atoms}{mol} \right) \right]}{MW_{Pt} * [NP] \left( \frac{NPs}{mL} \right) * 10^3 \left( \frac{mL}{L} \right)}$$

where Pt\_loading is the concentration (w/V) of Pt in the micellar solution (obtained by ICP-MS),  $N$  is the Avogadro's number,  $MW_{Pt}$  is the atomic weight of platinum, [NP] is the concentration of the nanoparticles has calculated by the protein utilities (DTS 5.0) software implemented in the Zetasizer Nano ZS instrument.

**Table S1**

| Cpd_NP | [NP] (NPs/mL) | Pt_loading (g/L) | Ptatoms/NP |
|--------|---------------|------------------|------------|
| 1      | 1,30E+10      | 0,008029975      | 1,91E+06   |
| 2      | 9,30E+09      | 0,007110888      | 2,36E+06   |
| 3      | 2,00E+10      | 0,008221723      | 1,27E+06   |
| 4      | 1,50E+10      | 0,007838701      | 1,61E+06   |

---

<sup>1</sup> Shamsuddin, S., Santillan, C. C., Stark, J. L., Whitmire, K. H., Siddik, Z. H., Khokhar, A. R. *J. Inorg. Biochem.* **1998**, 71, 29-35.

<sup>2</sup> Johnstone T.C., Lippard S.J., *Inorg. Chem.*, **2013**, 52, 9915–9920
